# Supplementary material
Source: PubMed Central journal article supplement (PMC7689684)
Supplement: NIHMS1624202-supplement-1.pdf [file NIHMS1624202-supplement-1.pdf]

# Supplementary Data

Figure S1. Kaplan-Meier Analysis of overall survival and disease specific survival in the separated MVAC discovery and Gem/Cis validation cohorts of patients with mutations in in ATM, RB1, FANCC (Mutant) versus those without a mutation in these genes (Wild Type).

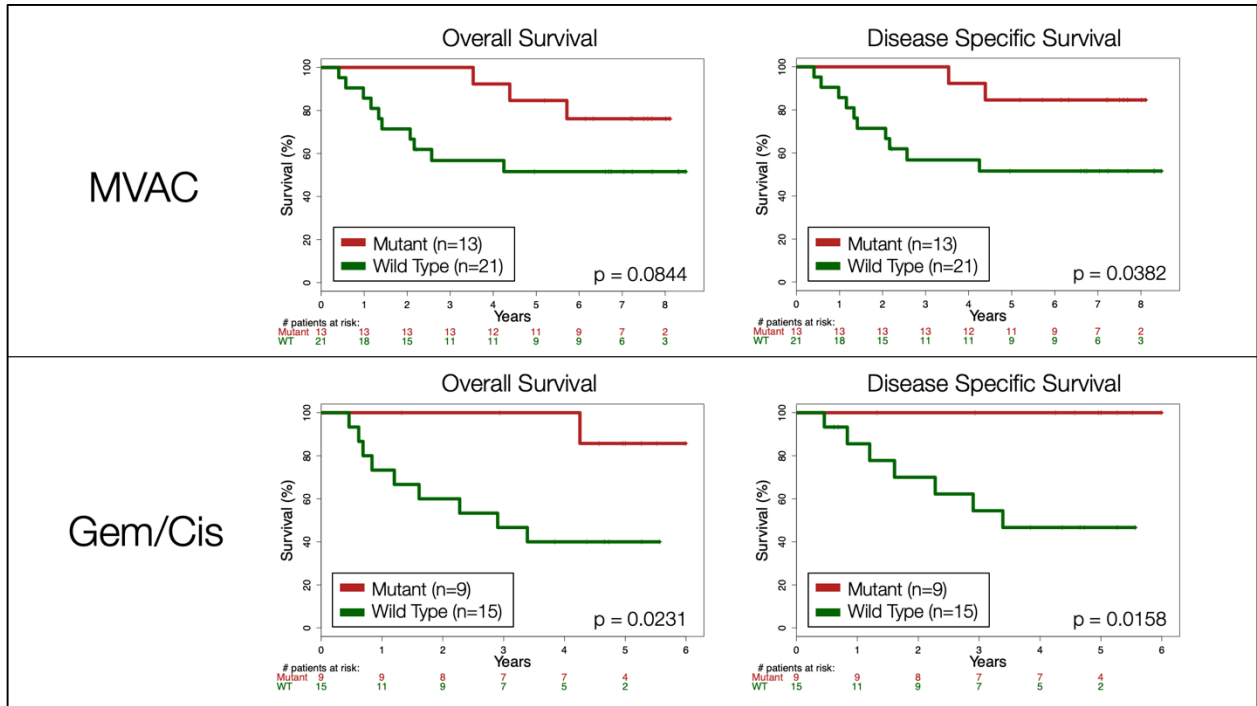

Figure S2. Overall Survival Kaplan-Meier Estimate generated via cBioPortal of patients with muscle invasive bladder cancer with mutations in ATM, RB1, FANCC compared to those without from the TCGA suggest no significant difference in overall survival in patients with a mutation when analyzed regardless of treatment. Of note, only a small number of patients (n=12) received neoadjuvant chemotherapy in this data set. (Robertson AG, Kim J, Al-ahmadie H, et al. Comprehensive Molecular Characterization of Muscle-Invasive Bladder Cancer. Cell. 2017;171(3):540-556.e25.)

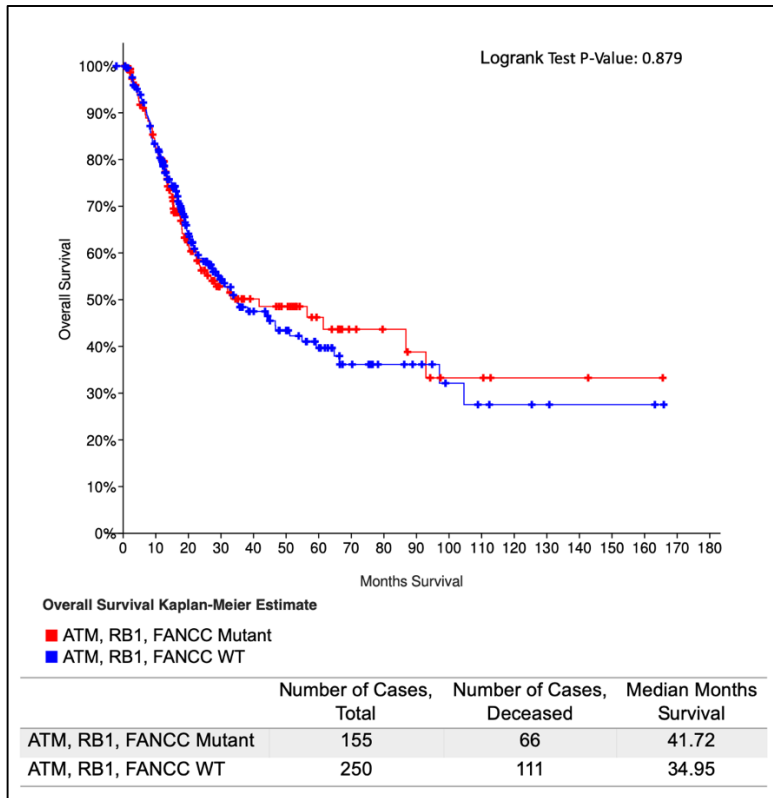

Table S1. Mutations listed by protein change, type of alteration and predicted functionality. A functional modeling score was designed to assess the potential biological consequence of alterations by using structural analysis and protein features and was compared to Polyphen2 score. These methodologies are published in the previous publication.<sup>8</sup>

| ATM              |               |                    | RB1              |               |                    | FANCC            |               |                    |
|------------------|---------------|--------------------|------------------|---------------|--------------------|------------------|---------------|--------------------|
| Protein Mutation | Mutation Type | Predicted Function | Protein Mutation | Mutation Type | Predicted Function | Protein Mutation | Mutation Type | Predicted Function |
| Y2009H           | Missense      | Deleterious        | R787*            | Stop          | Deleterious        | L52F             | Missense      | Deleterious        |
| D1563N           | Missense      | Deleterious        | Loss             | Loss          | Deleterious        | R185*            | Stop          | Deleterious        |
| R3008C           | Missense      | Deleterious        | F216fs*7         | Stop          | Deleterious        | I312V            | Missense      | Deleterious        |
| L3035F           | Missense      | Deleterious        | S862G            | Missense      | Neutral            | E539K            | Missense      | Deleterious        |
| L1019V,          | Missense      | Deleterious        | Splice 920       | Splice        | Deleterious        |                  |               |                    |
| K2413Q           | Missense      | Neutral            | L665V            | Missense      | Deleterious        |                  |               |                    |
| R2580K           | Missense      | Deleterious        | R455*            | Stop          | Deleterious        |                  |               |                    |
| L1419fs*4        | Stop          | Deleterious        | R787fs*23        | Stop          | Deleterious        |                  |               |                    |
| R337H            | Missense      | Deleterious        | S360fs*2         | Stop          | Deleterious        |                  |               |                    |
| E2895K           | Missense      | Deleterious        | Splice           | Splice        | Deleterious        |                  |               |                    |
| E2932D           | Missense      | Deleterious        | G801E            | Missense      | Deleterious        |                  |               |                    |
| D1791N           | Missense      | Neutral            | D1791N           | Missense      | Deleterious        |                  |               |                    |
| Splice 17        | Splice        | Deleterious        | P595fs*47        | Stop          | Deleterious        |                  |               |                    |
| R2443Q           | Missense      | Deleterious        | Q444H            | Missense      | Deleterious        |                  |               |                    |
| E1325K           | Missense      | Deleterious        | E492K            | Missense      | Deleterious        |                  |               |                    |

Table S2. Incidence of mutations in ATM, RB1 and FANCC in the cohort of patients sequenced for this study (n=58) as compared to the muscle invasive bladder cancer cohort from the TCGA (n= 408) queried via cBioPortal.

|       | Combined Study<br>Cohort<br>(n = 58) | TCGA<br>Cohort<br>(n = 408) |
|-------|--------------------------------------|-----------------------------|
| ATM   | 19% (11/58)                          | 15%                         |
| RB1   | 19% (11/58)                          | 25%                         |
| FANCC | 7% (4/58)                            | 2.9%                        |
